# Supplementary material for: Enantioselective total synthesis of (+)-serinolamide A
Source: Royal Society of Chemistry journal article supplement (doi:10.1039/c5ra06609c), 2015-01-01

# Supporting Information

## Enantioselective total synthesis of (+)-serinolamide A

Suraksha Gahalawat and Satyendra Kumar Pandey\*

*School of Chemistry and Biochemistry, Thapar University, Patiala 147001, India*

\*Corresponding Author: Phone: +91-84379-08745; Fax No.: +91-175-236-4498

E-mail: [skpandey@thapar.edu](mailto:skpandey@thapar.edu)

### Table of contents

#### General Experimental

|                                     |                               |               |
|-------------------------------------|-------------------------------|---------------|
| 1. $^1\text{H}$ and $^{13}\text{C}$ | spectra for compound <b>8</b> | <b>S2- S3</b> |
| 2. $^1\text{H}$ and $^{13}\text{C}$ | spectra for compound <b>4</b> | <b>S4- S5</b> |
| 3. $^1\text{H}$ and $^{13}\text{C}$ | spectra for compound <b>9</b> | <b>S6- S7</b> |
| 4. $^1\text{H}$ and $^{13}\text{C}$ | spectra for compound <b>2</b> | <b>S8- S9</b> |
| 5. $^1\text{H}$ and $^{13}\text{C}$ | spectra for compound <b>1</b> | <b>S10-11</b> |

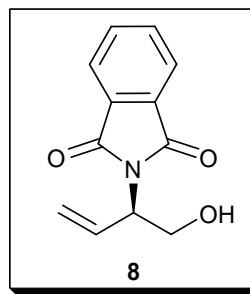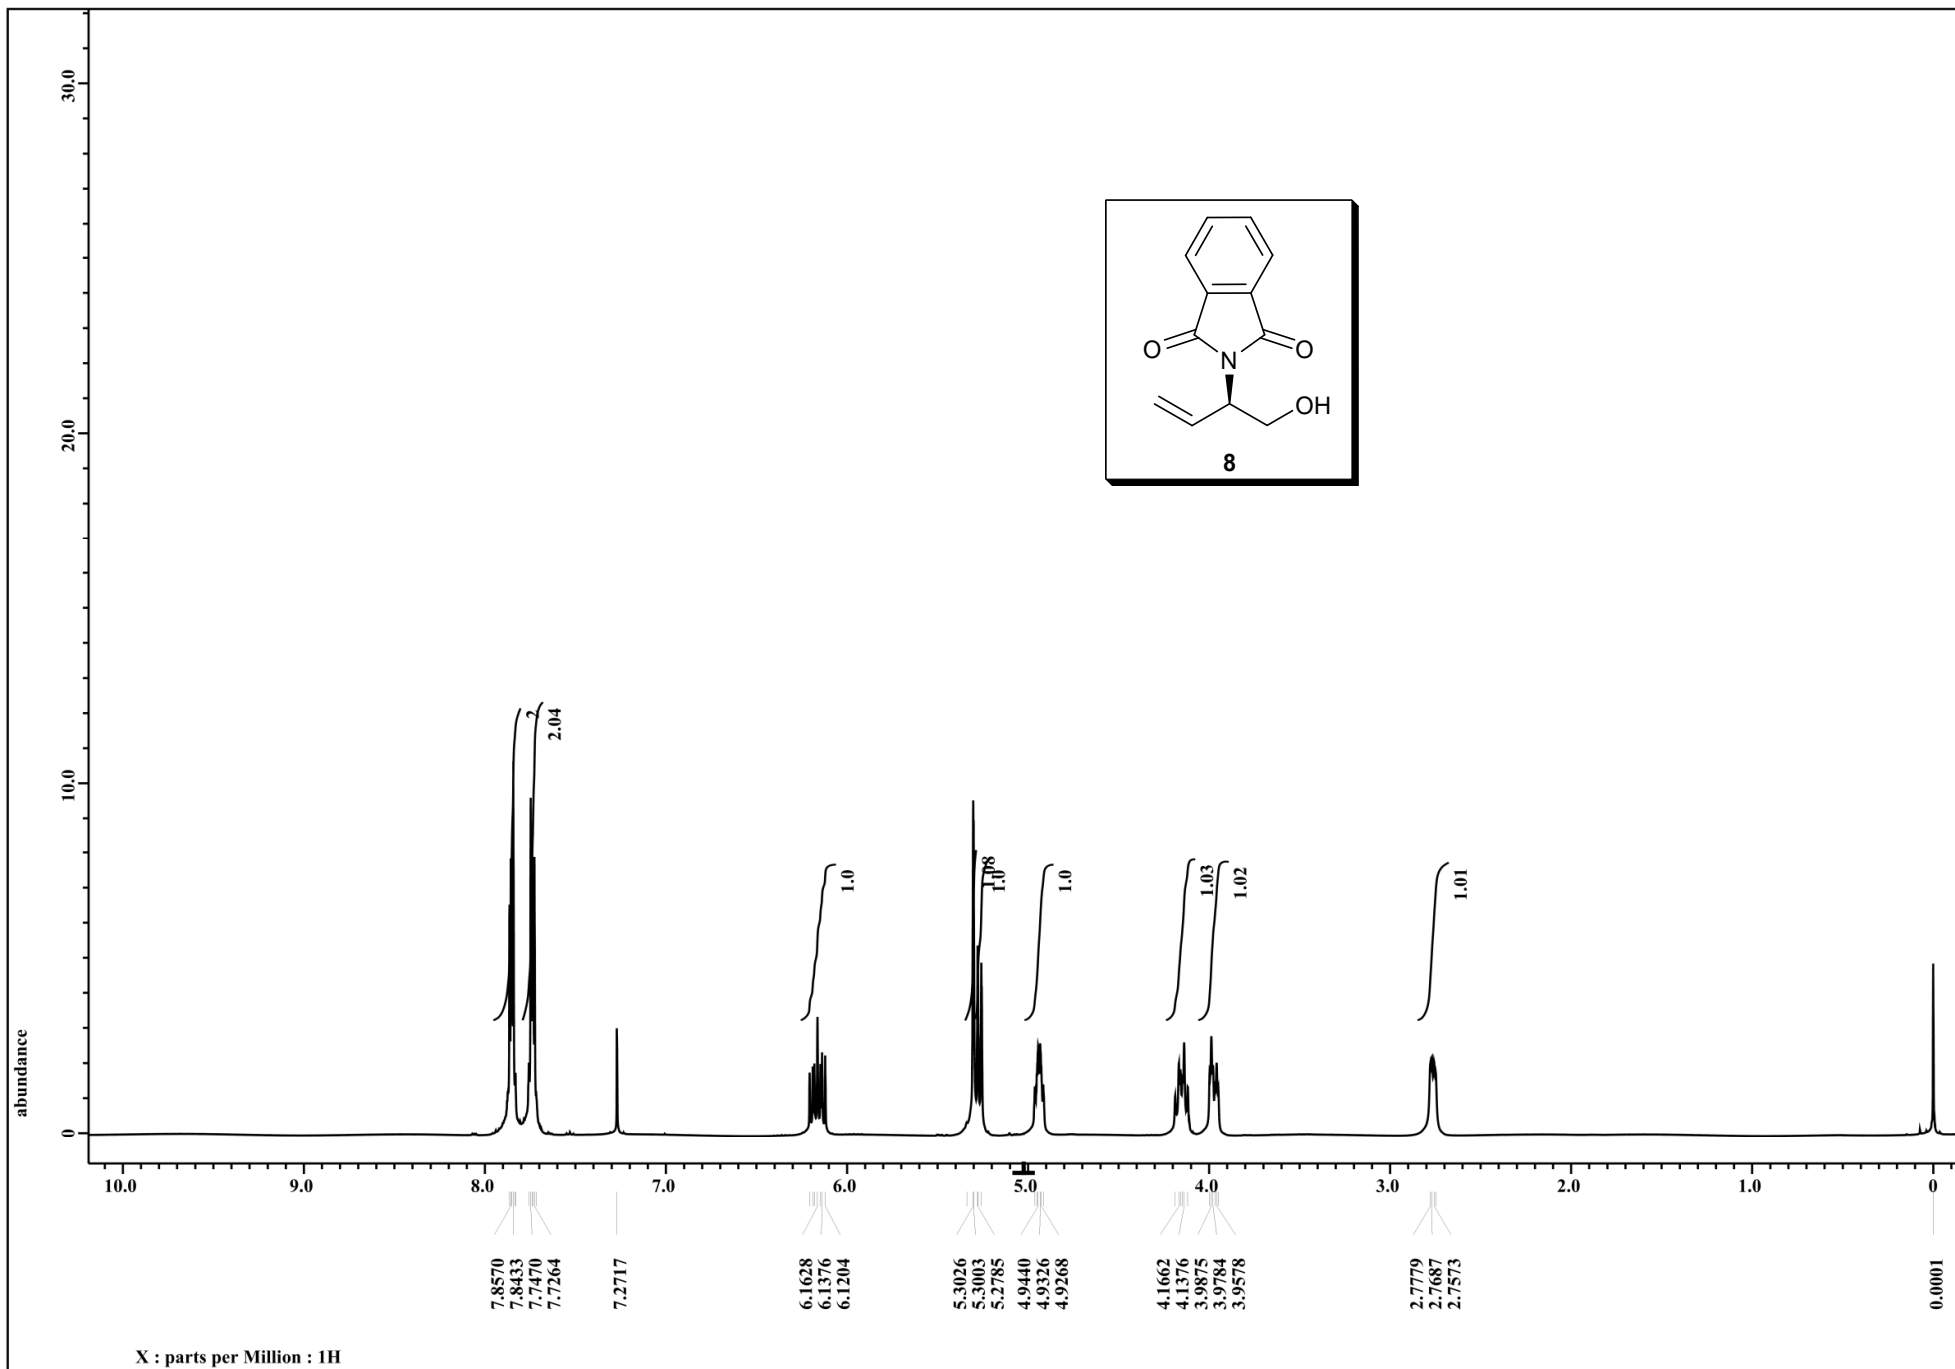

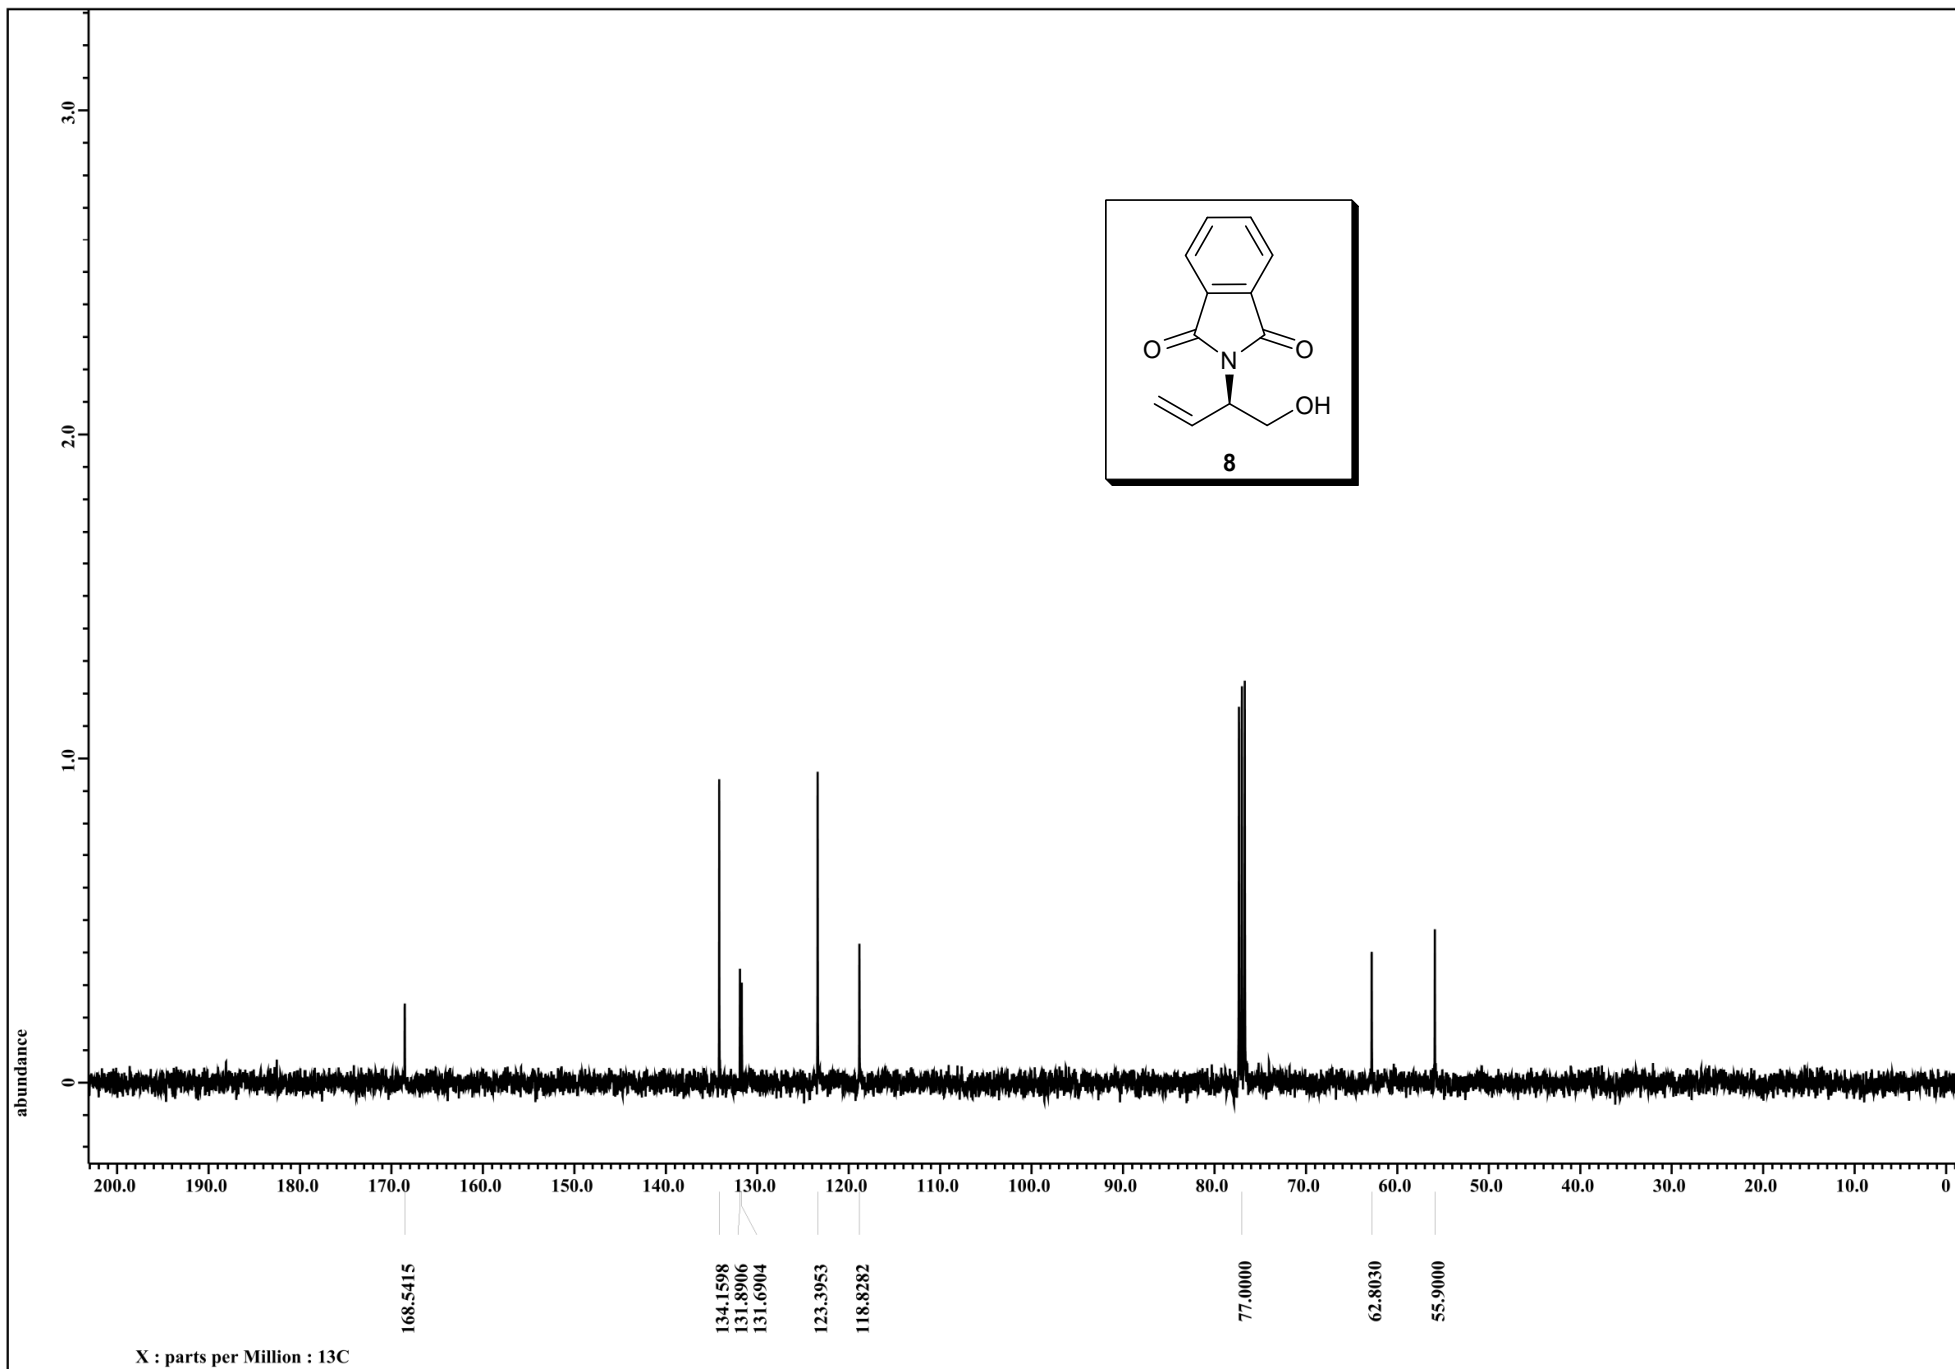

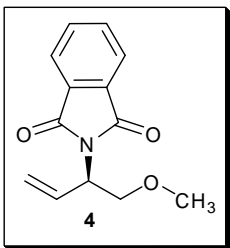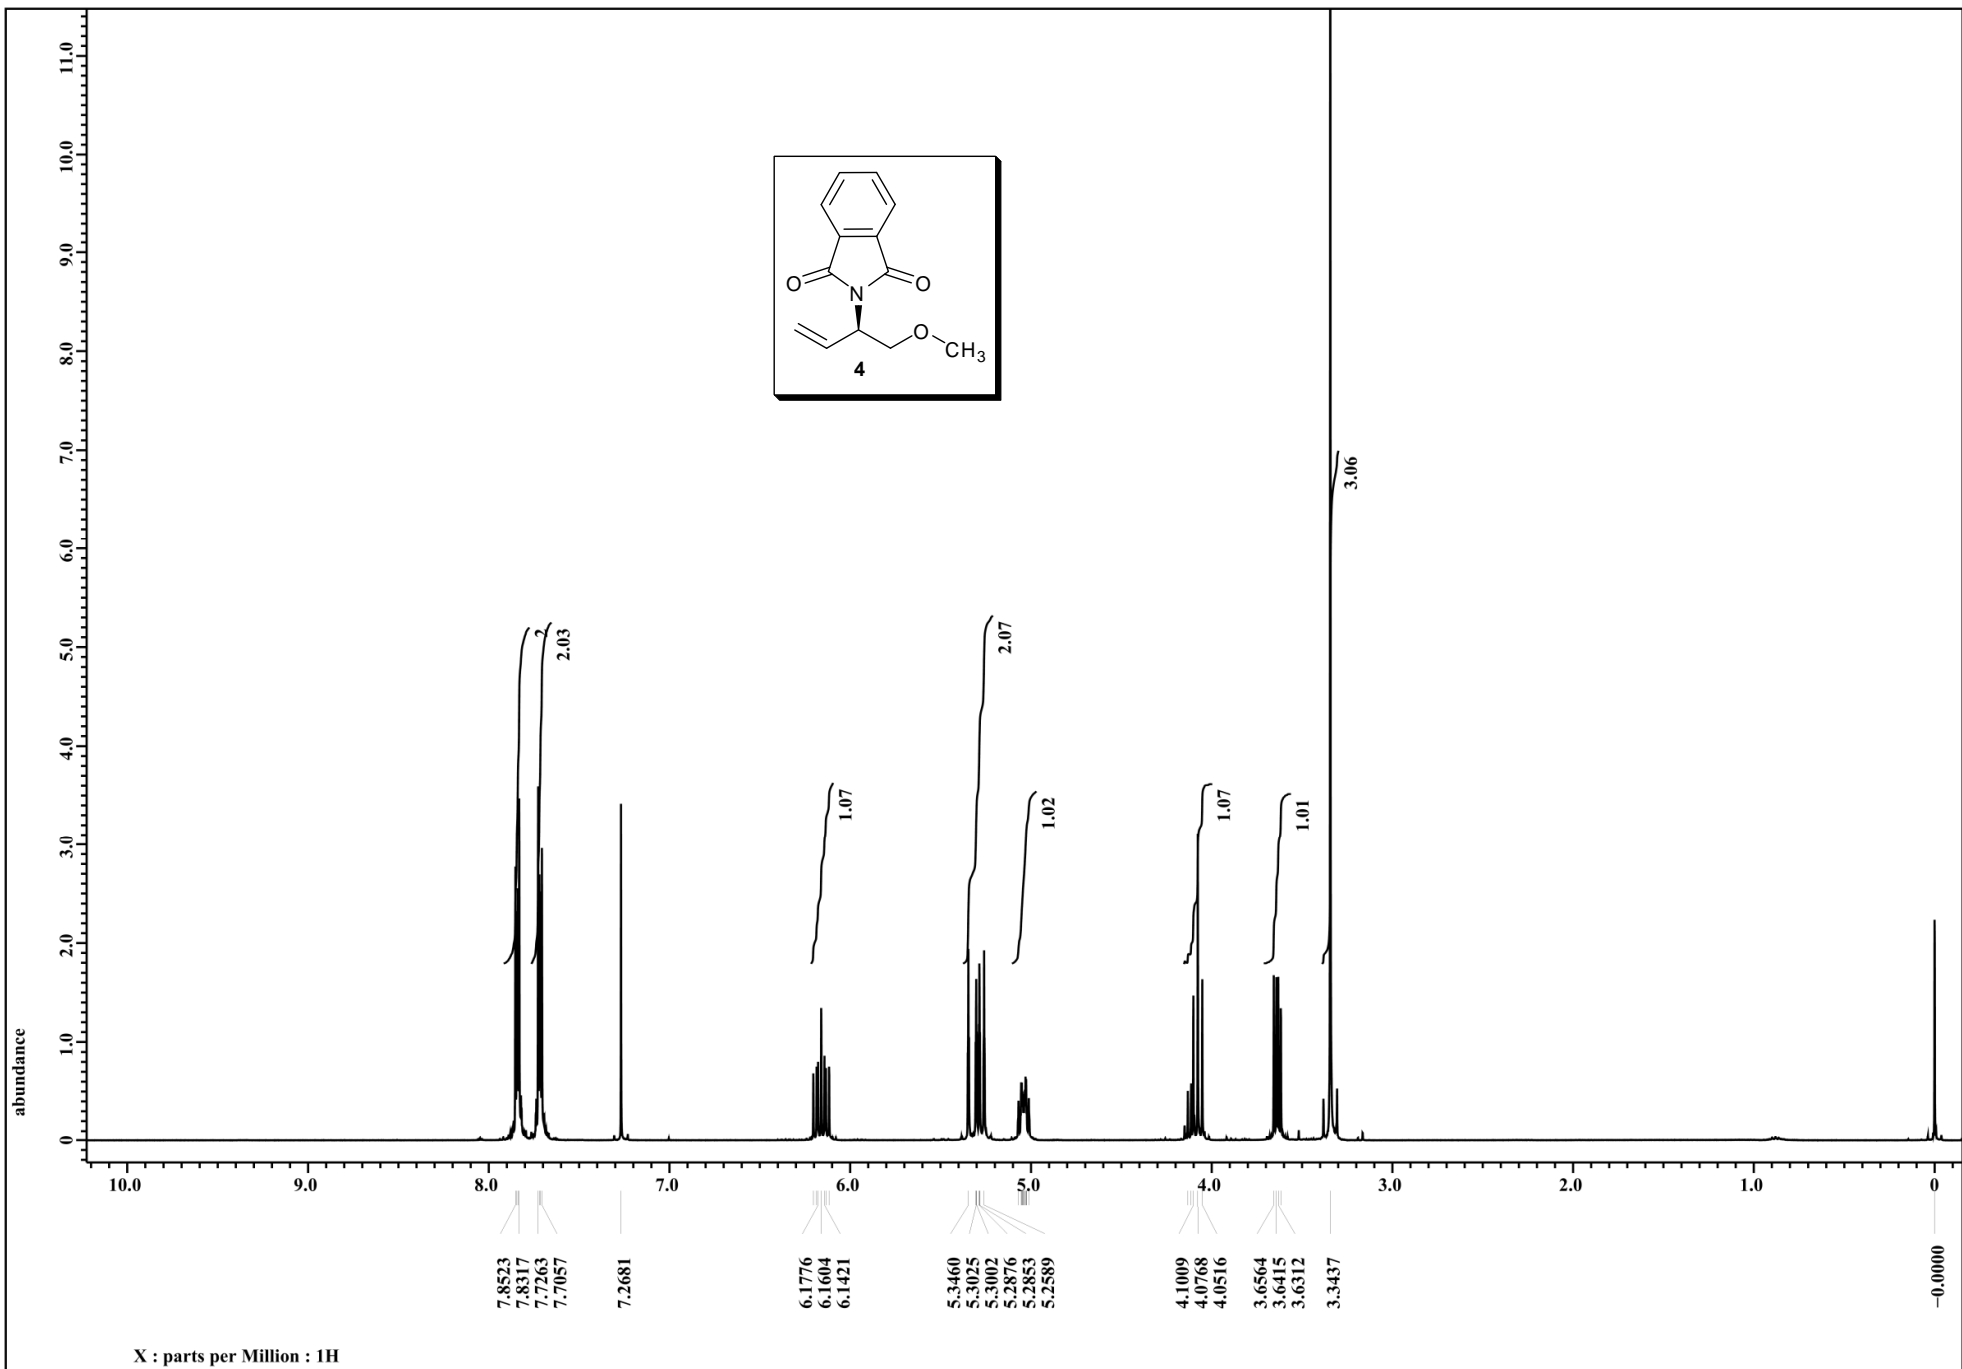

X : parts per Million : 1H

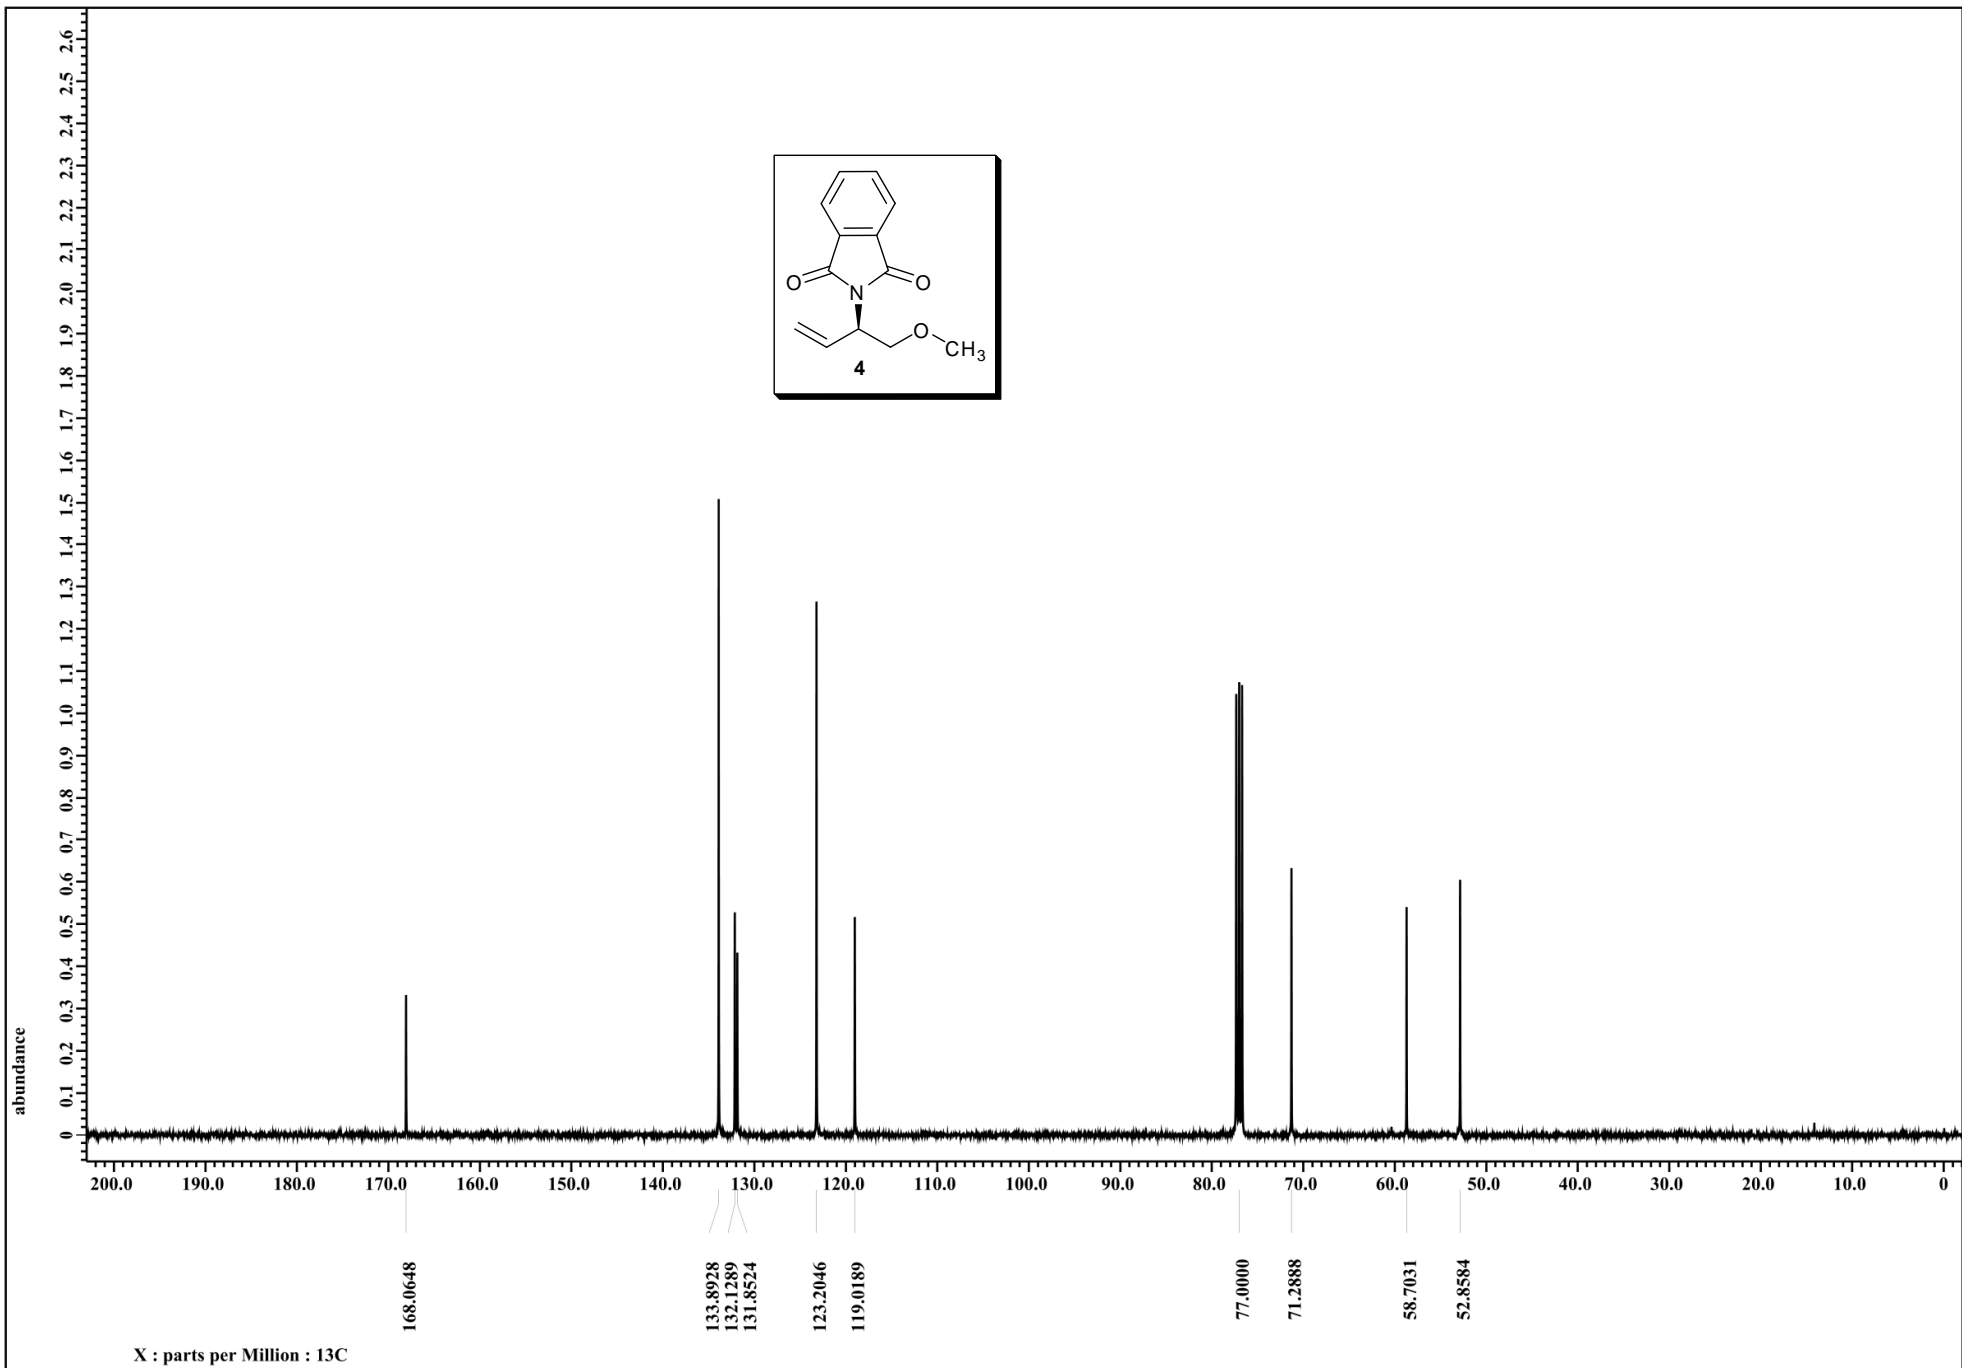

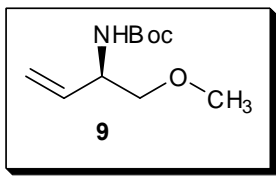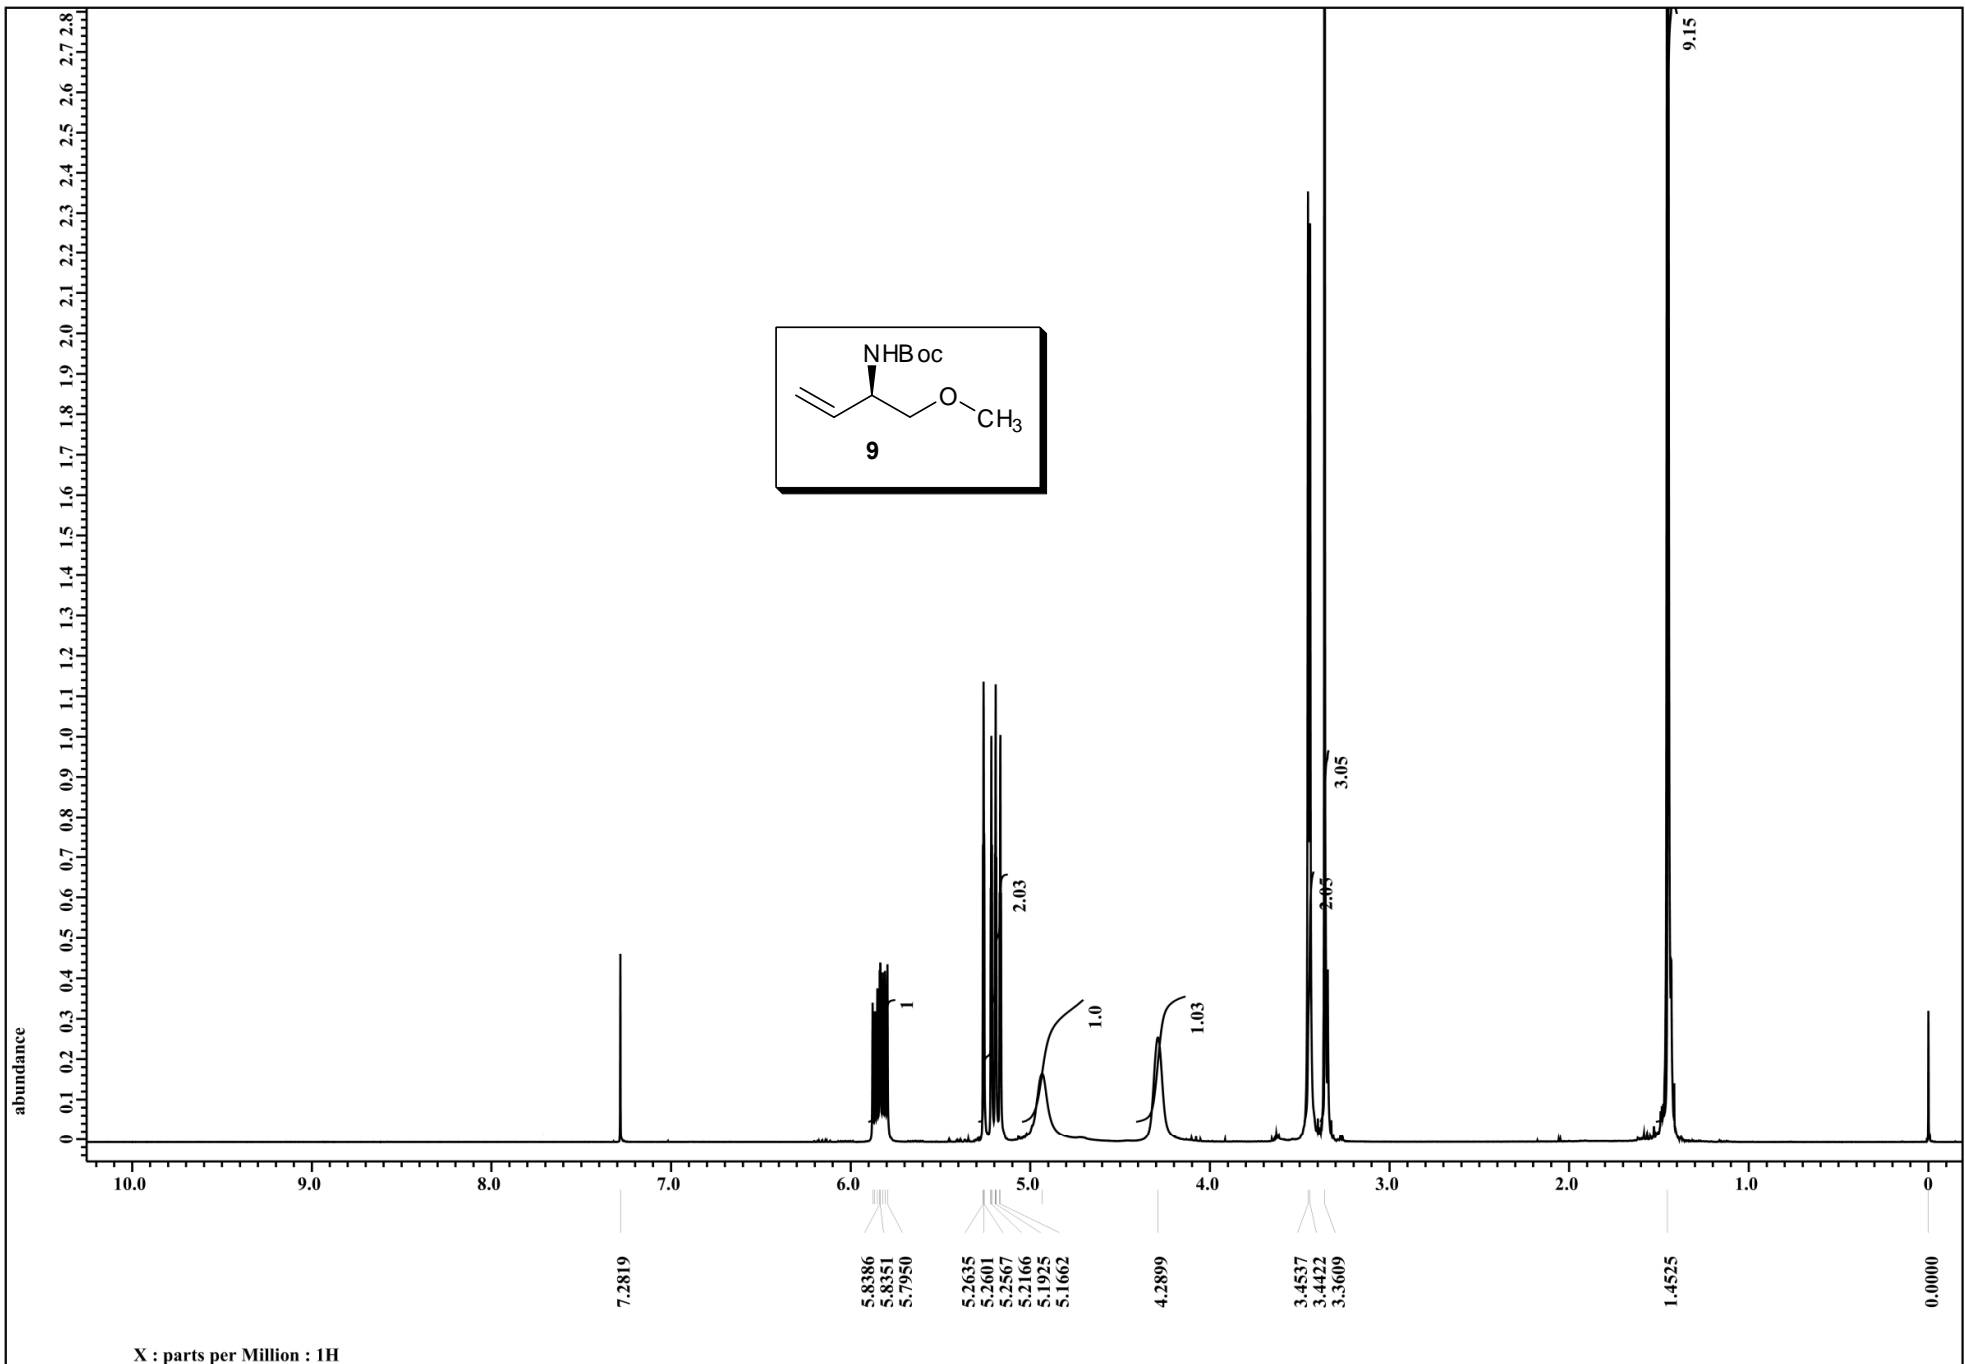

X : parts per Million : 1H

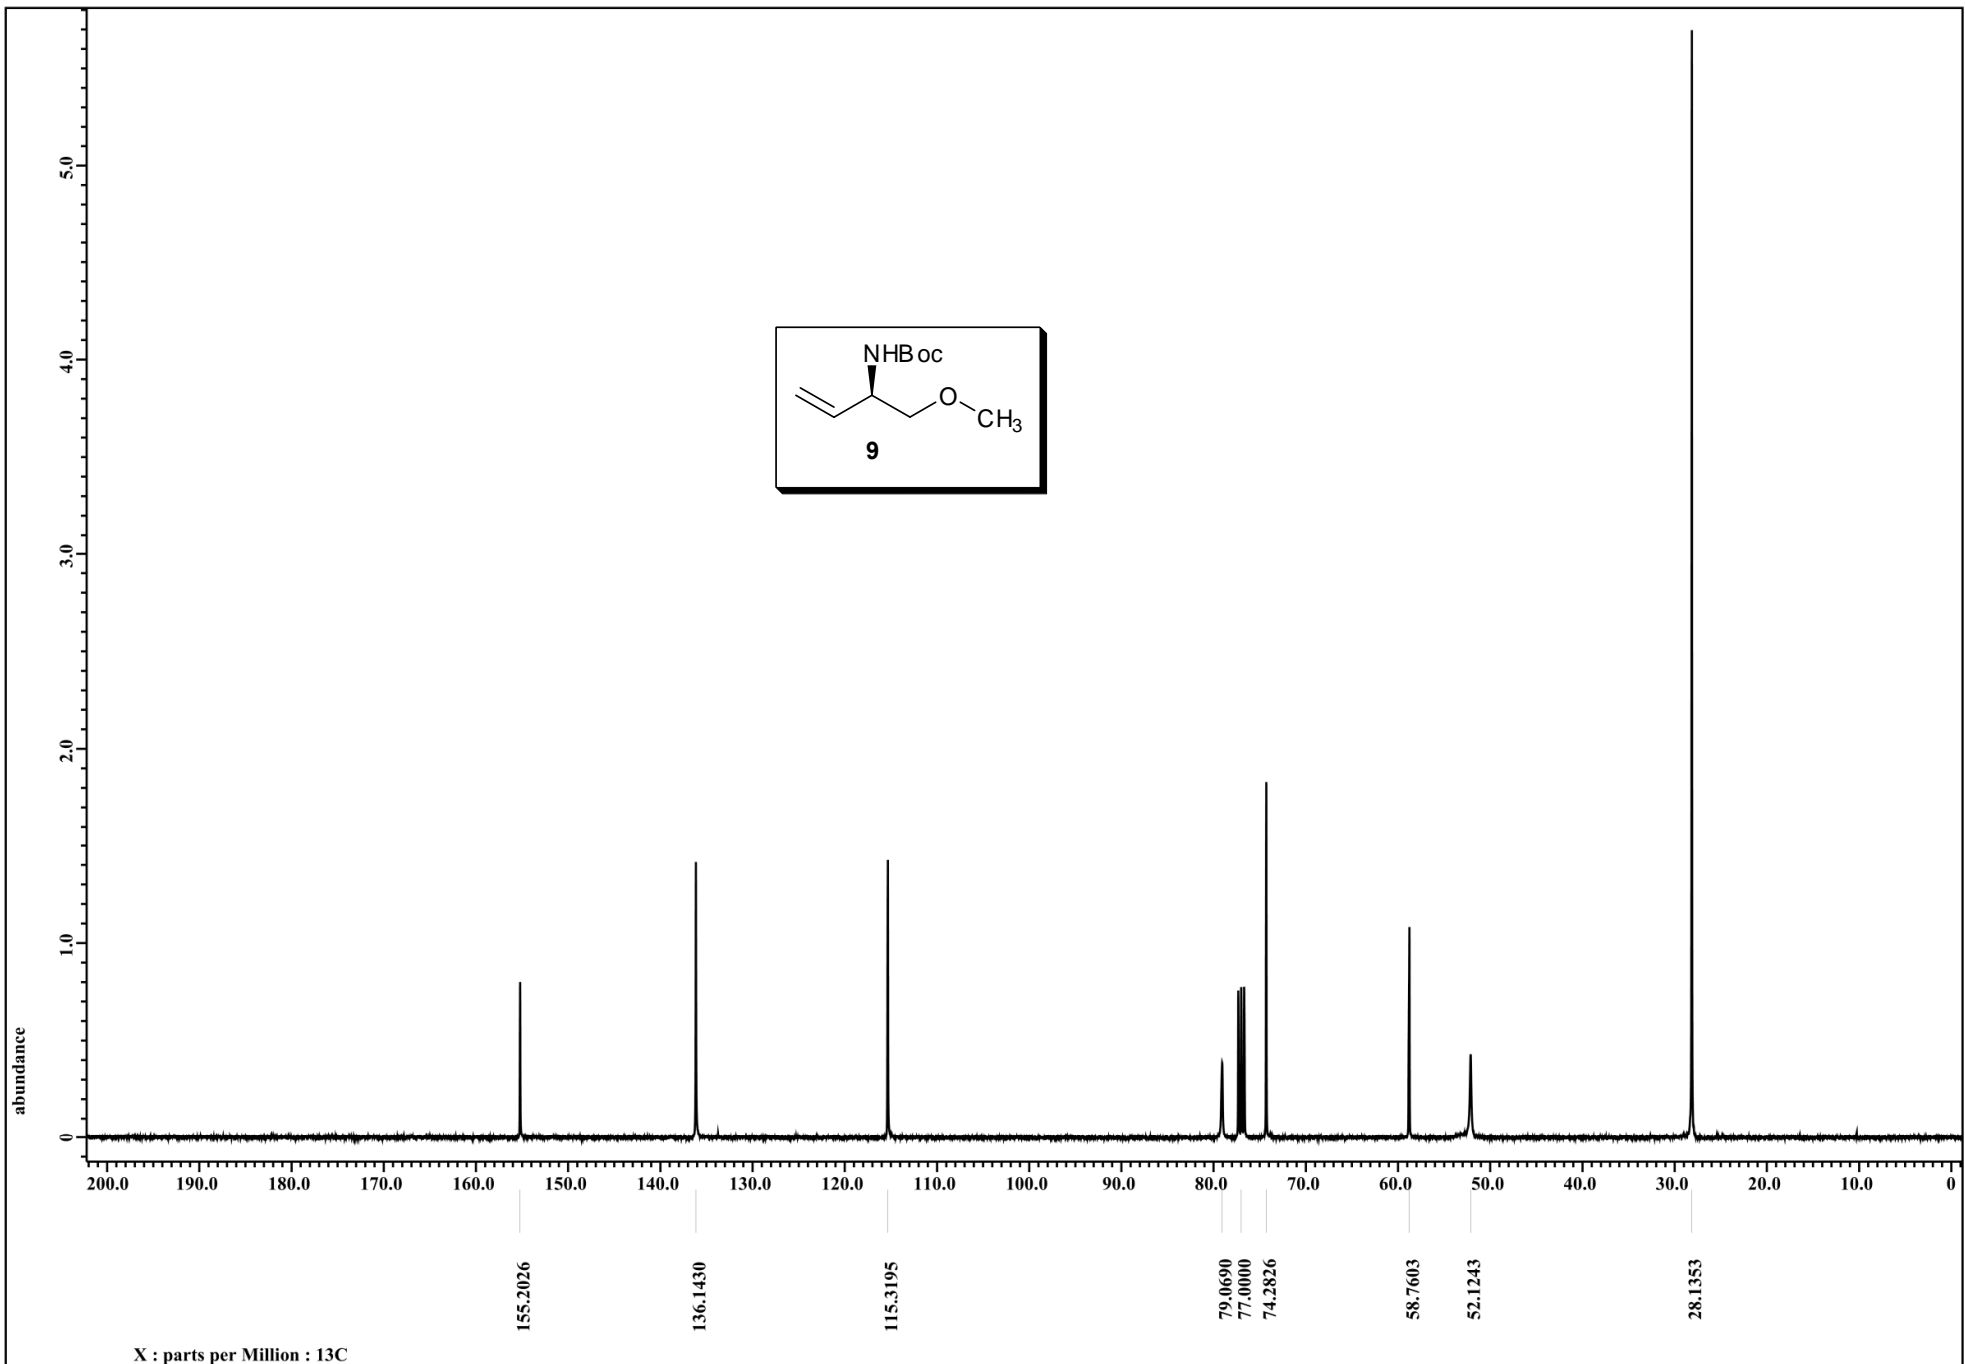

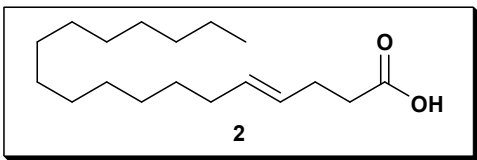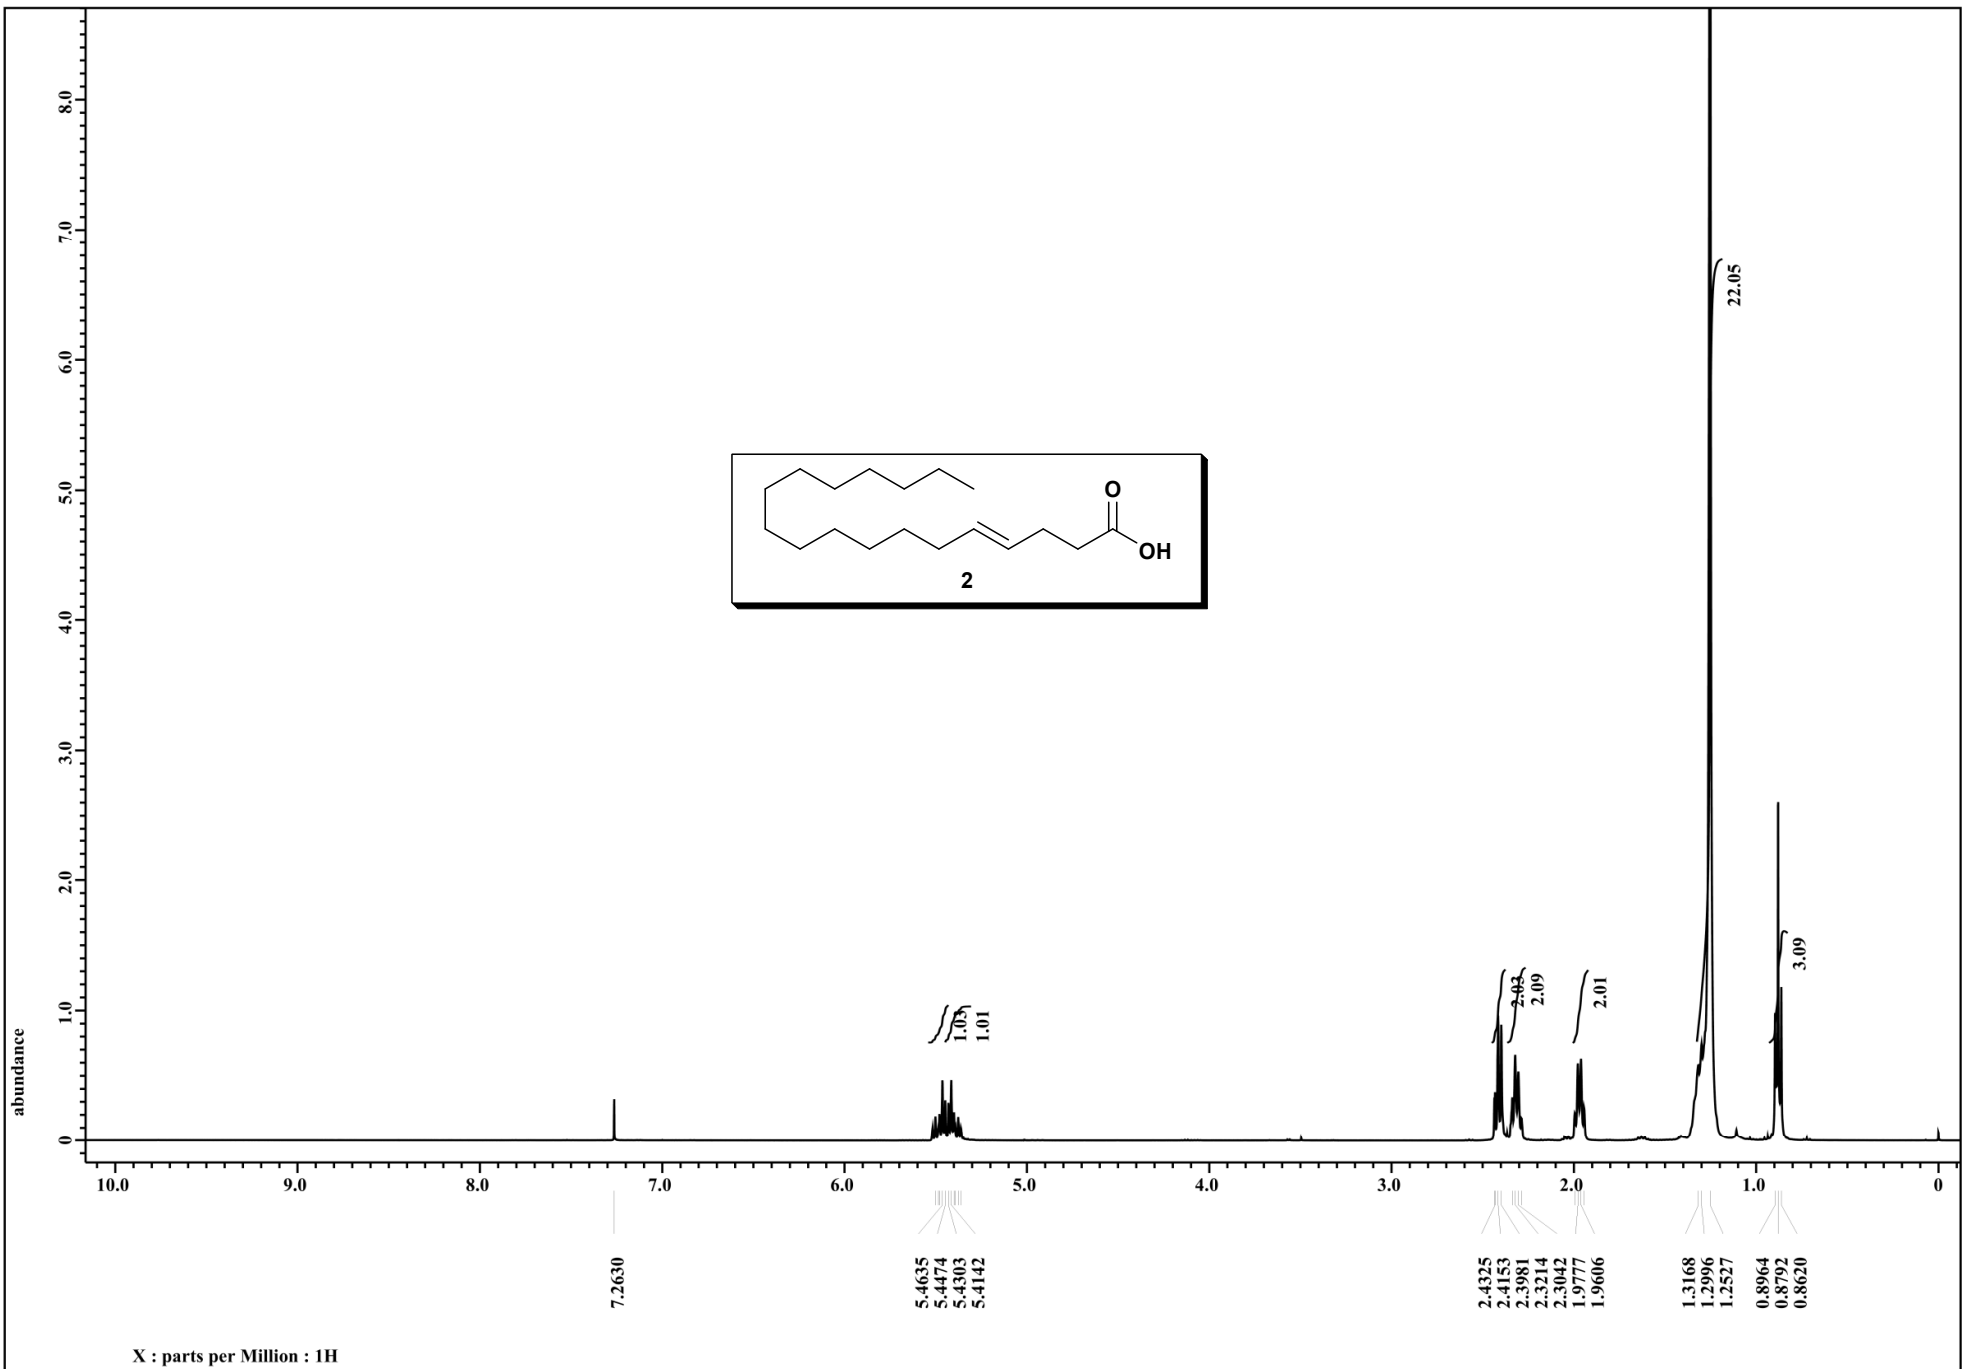



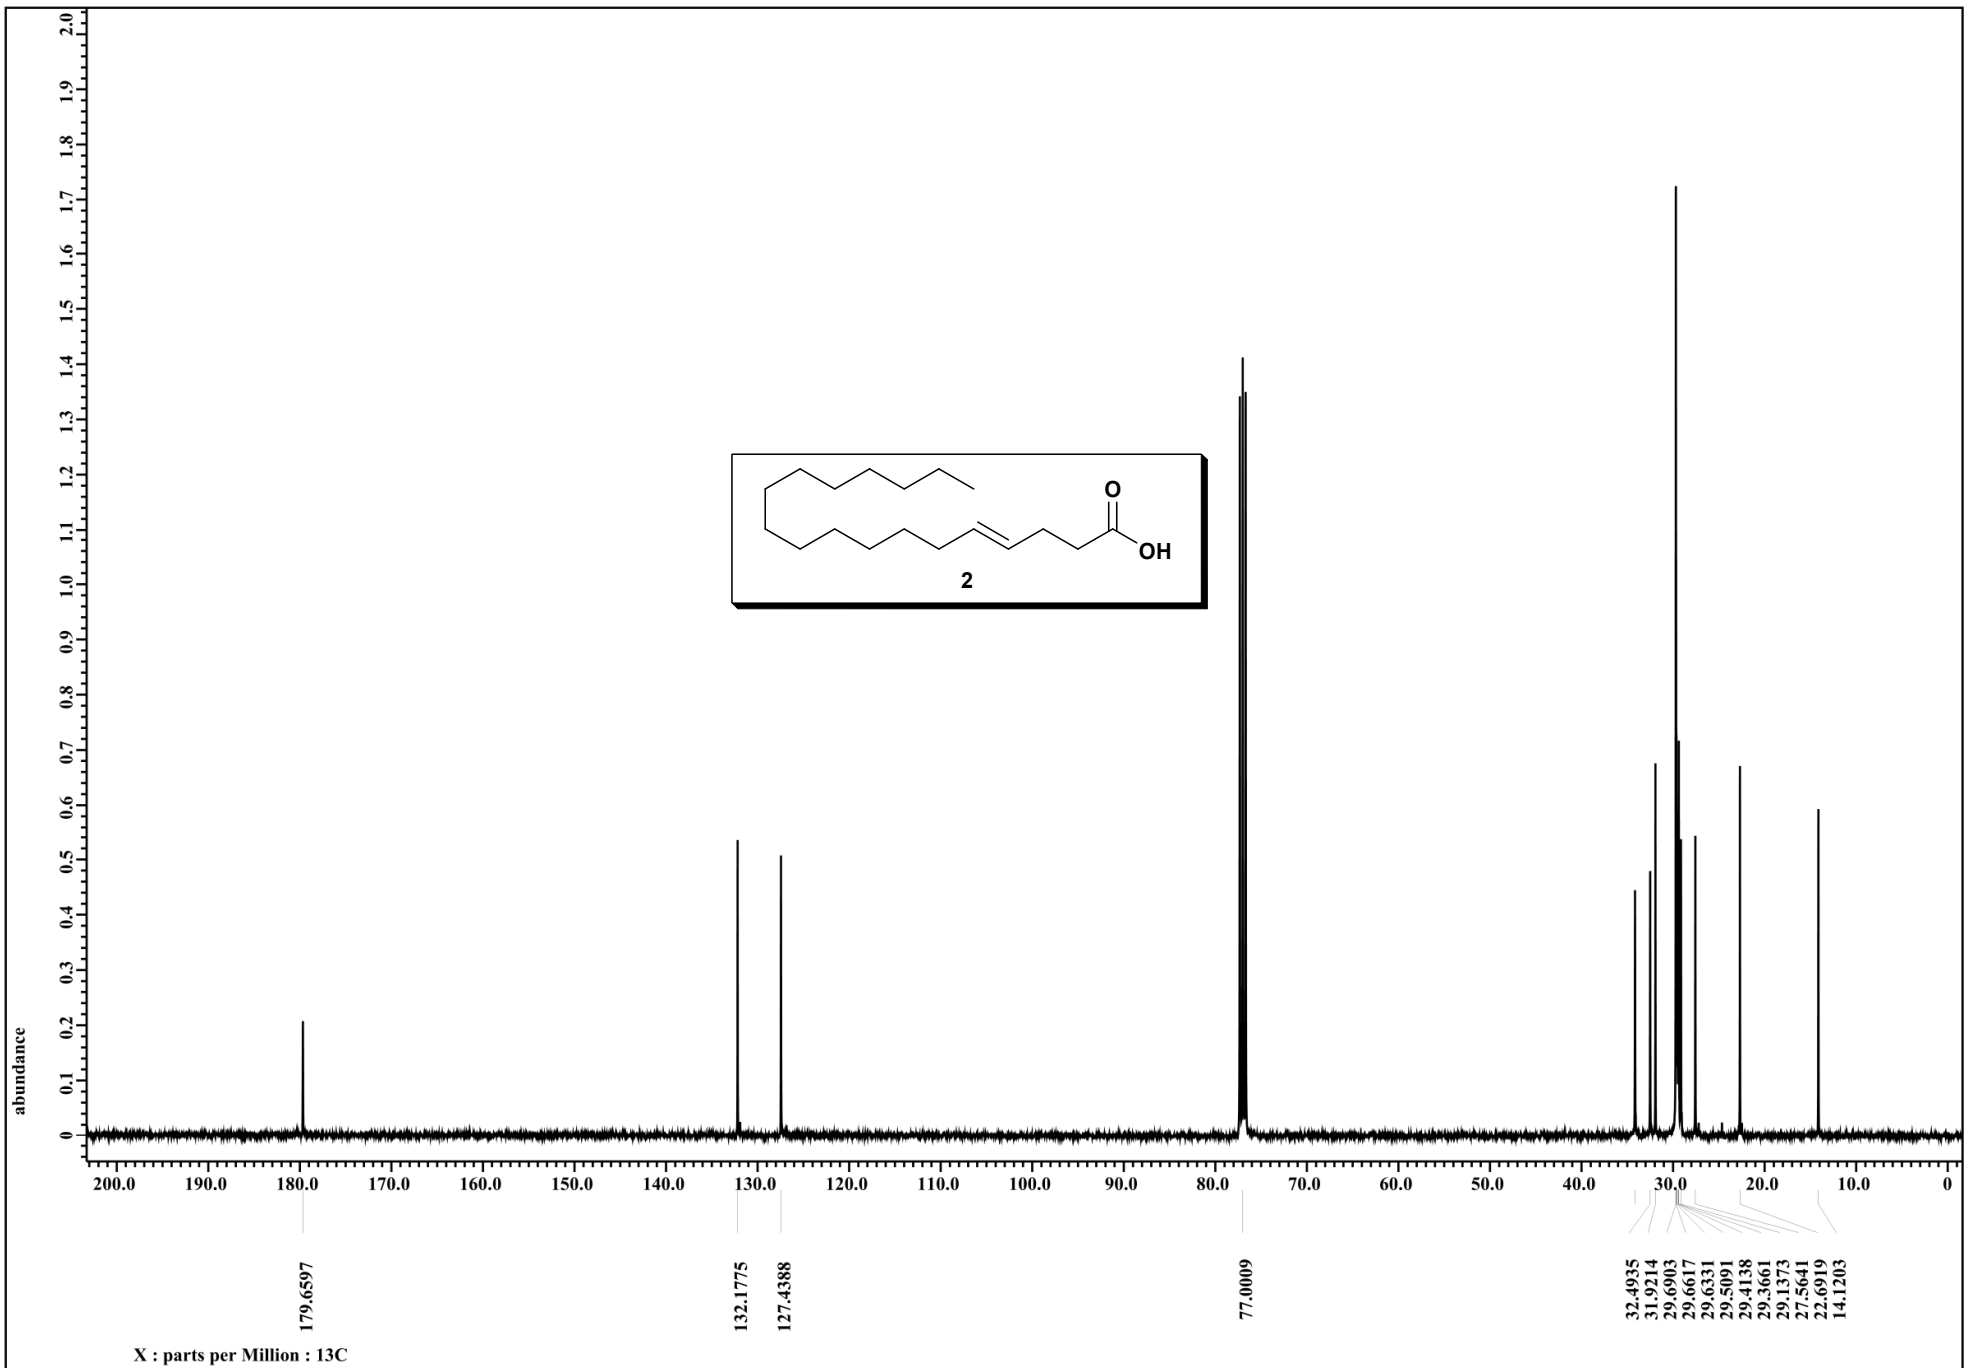

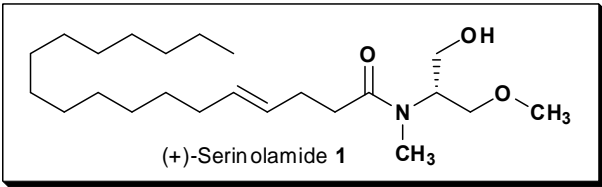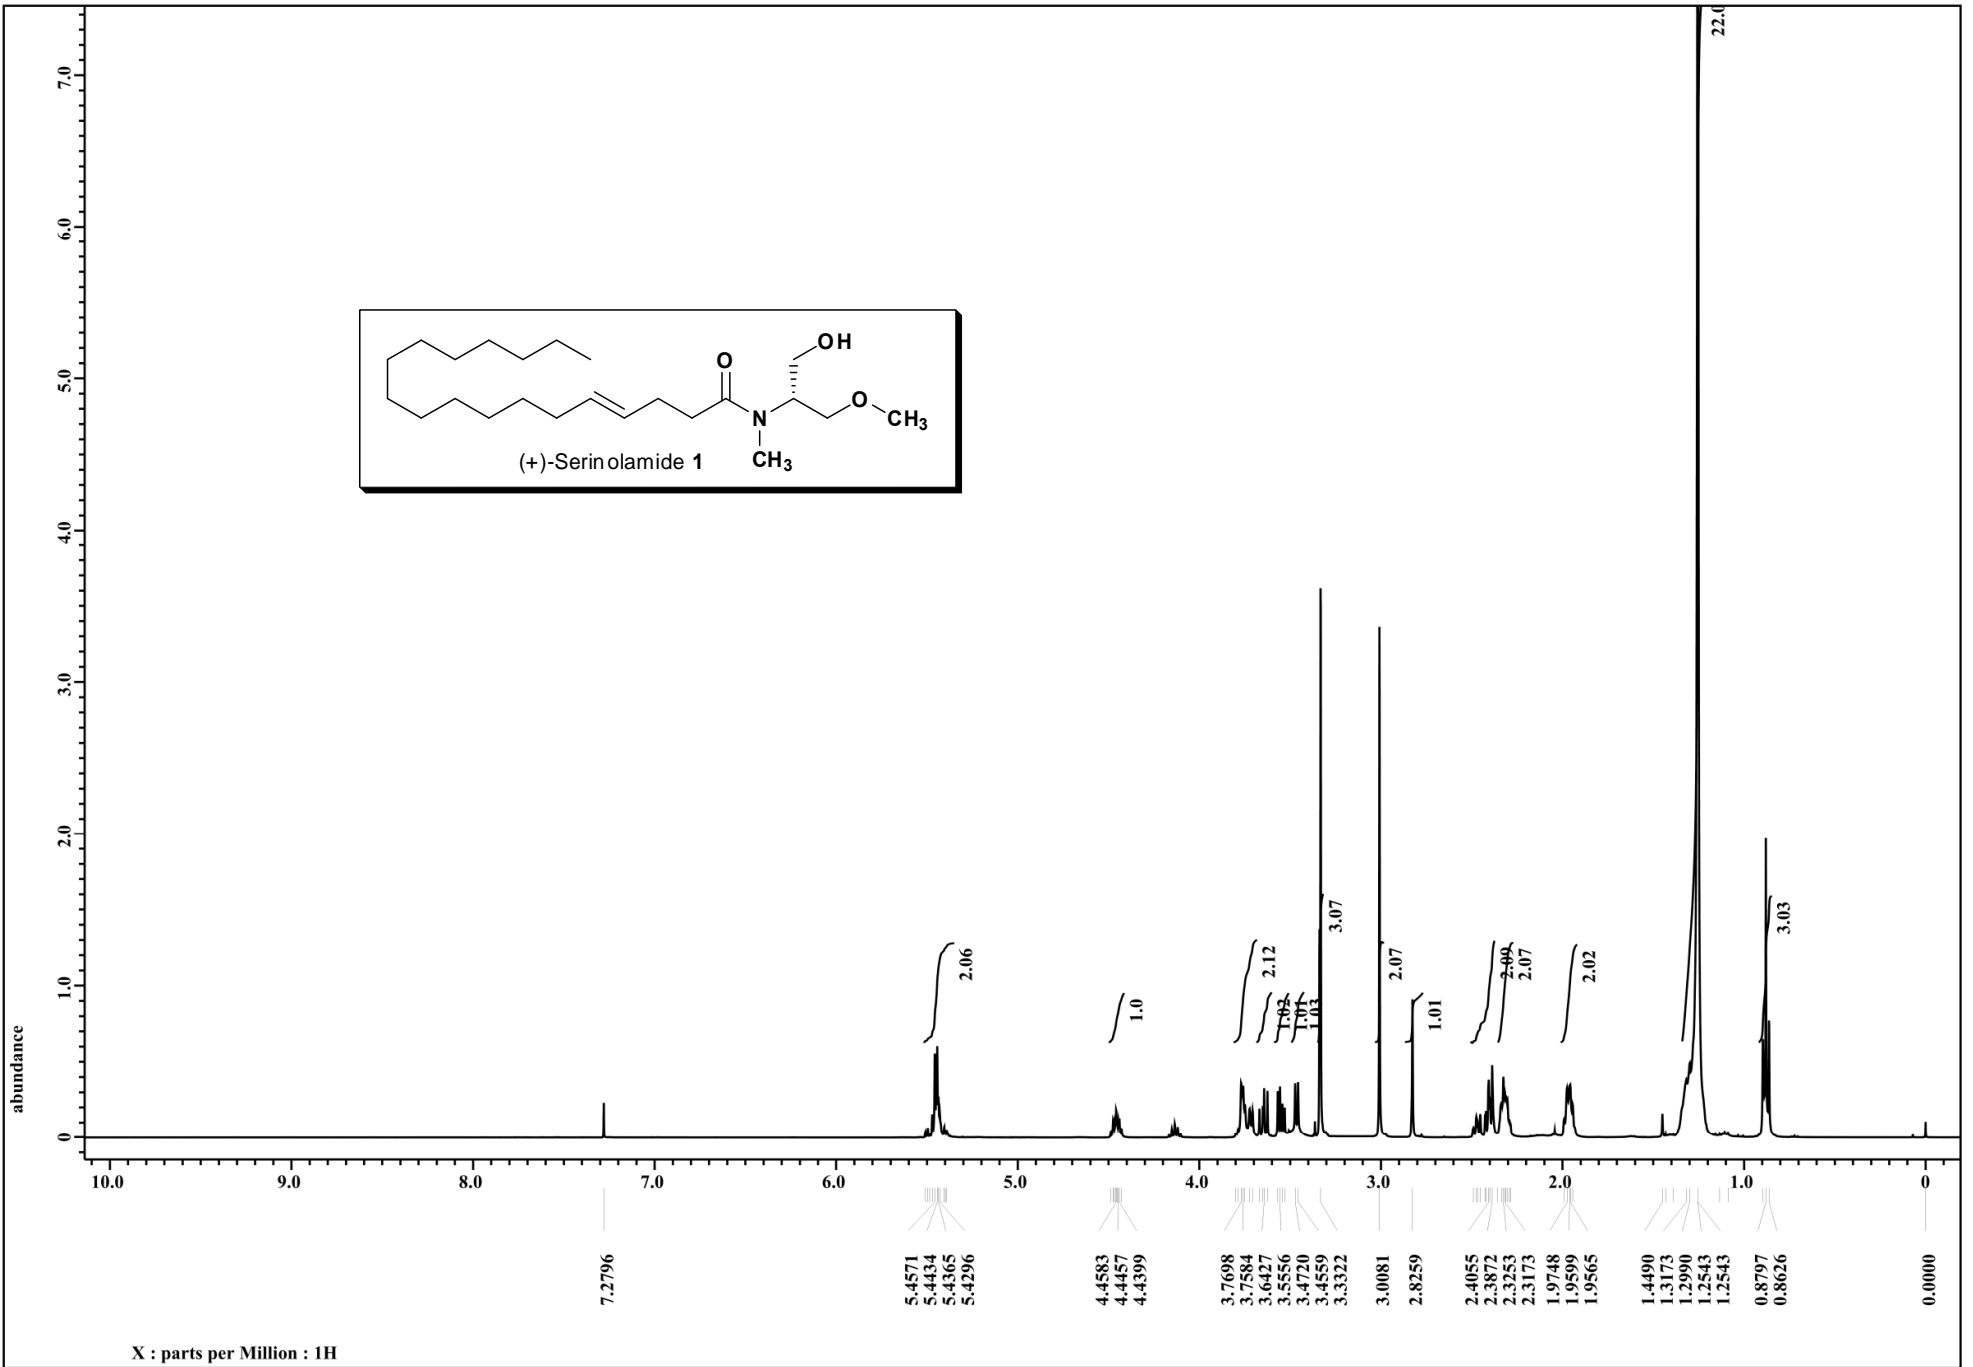

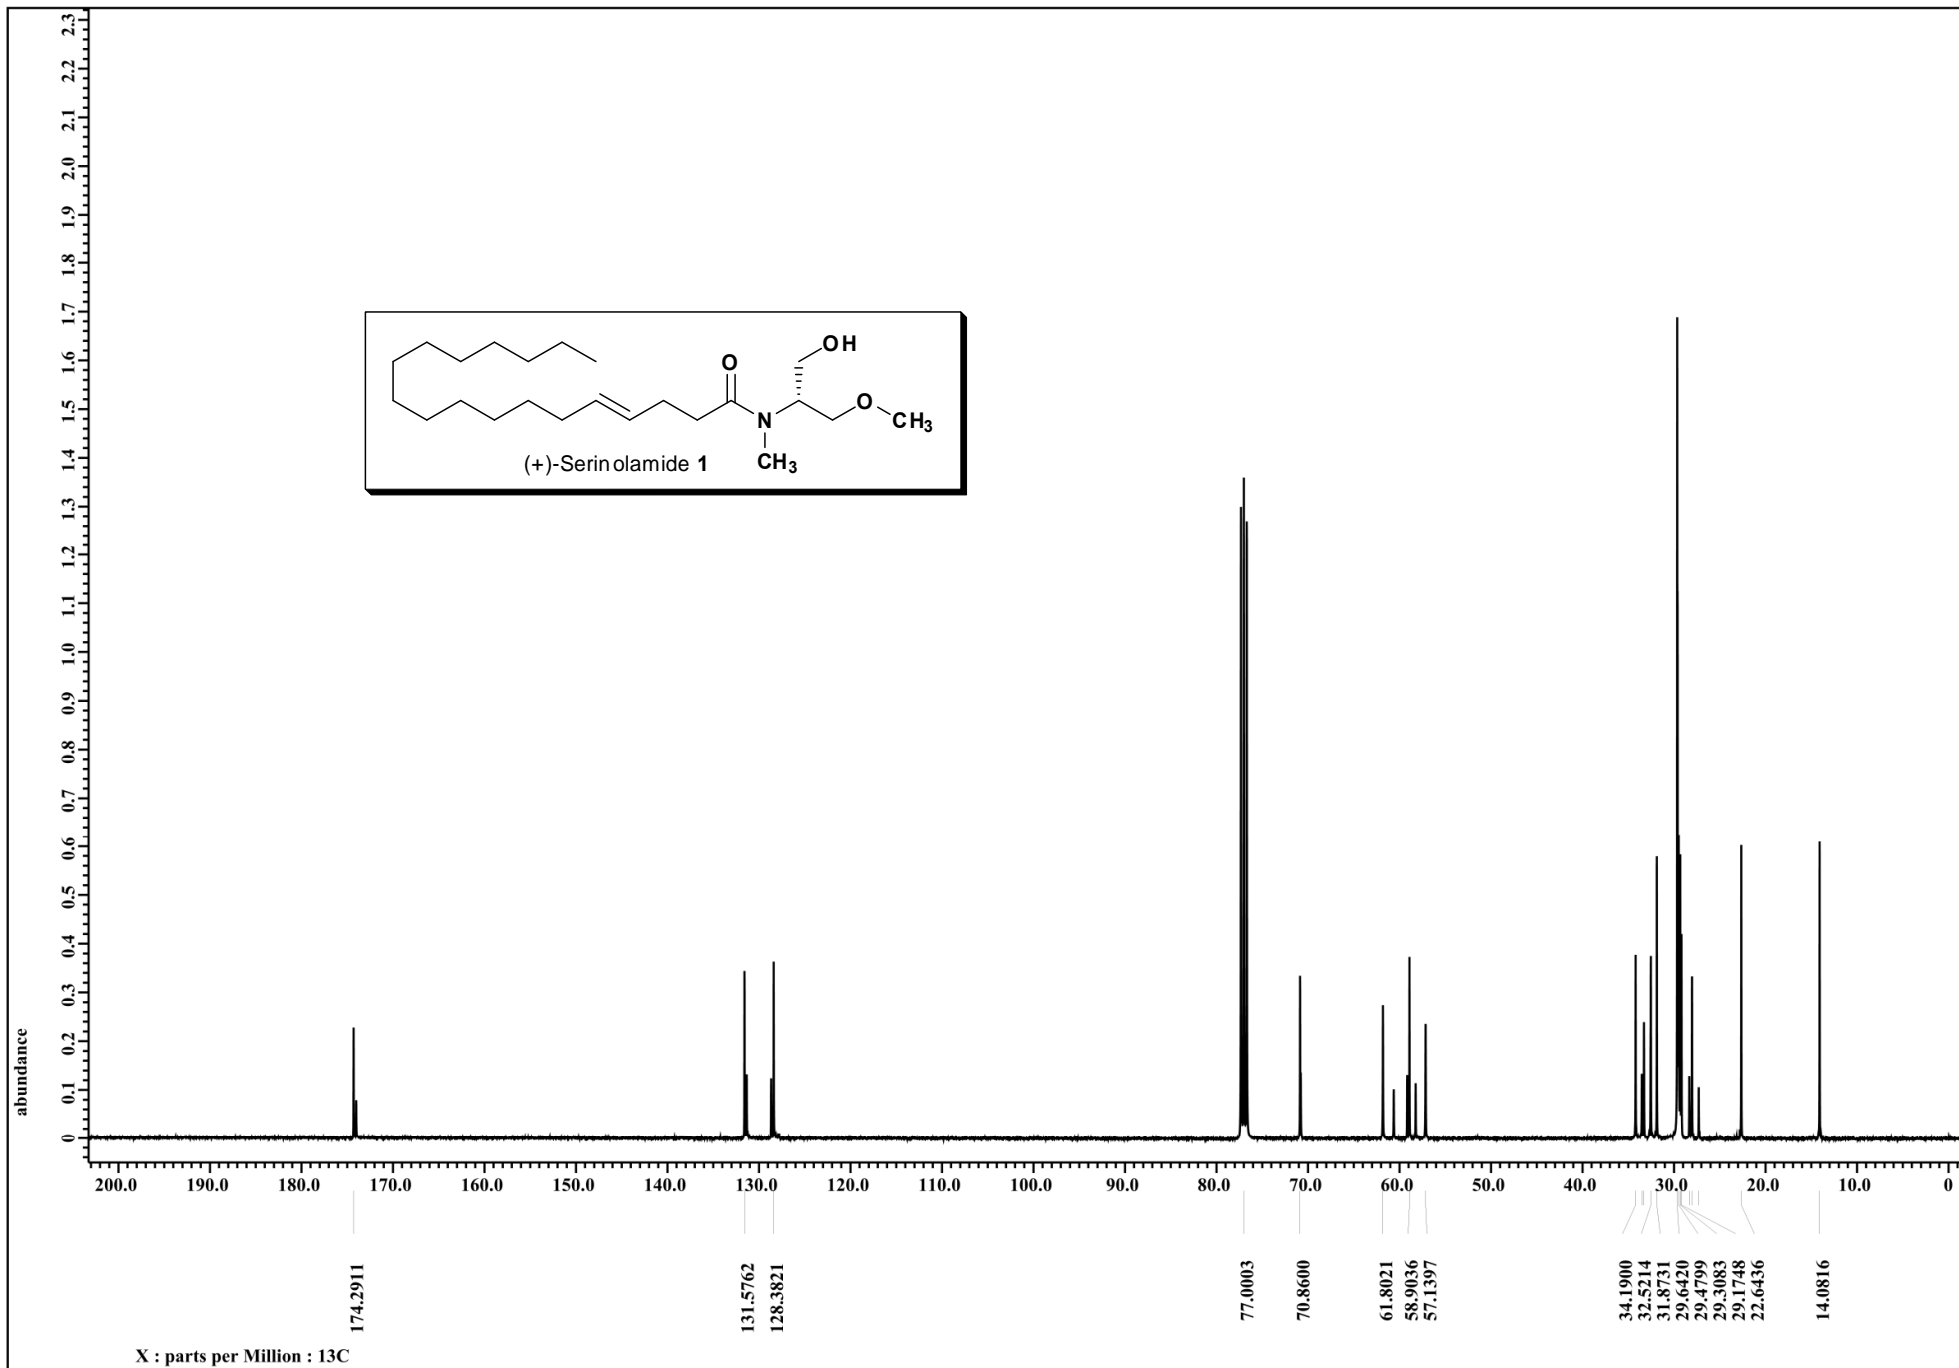

Supplement: c5ra06609c1.pdf [file c5ra06609c1.pdf]
